# Supplementary material for: Self-Injurious Behaviour during Early Childhood in a General Population Sample – Exploratory Analysis in the Norwegian Mother, Father and Child Cohort Study (MoBa)
Source: Research Square preprint supplement (doi:10.21203/rs.3.rs-7235784/v1), 2025-08-07
Supplement: Supplementary file 1 [file c906e72396ad649647139409.docx]

**Article Title: Self-Injurious Behaviour during Early Childhood in a General Population Sample – Exploratory Analysis in the Norwegian Mother, Father and Child Cohort Study (MoBa)**

**Journal Name: European Child and Adolescent Psychiatry**

**Author names:** Anastasia Izotova, Line Indrevoll Stänicke,Becky Mars, Kim Stene-Larsen, Laurie J. Hannigan,Anne-Siri Øyen, Helga Ask, George Davey Smith, Anne Reneflot, Alexandra Havdahl, Robyn E. Wootton

**Corresponding author (Anastasia Izotova) – affiliations:** Research Department, Lovisenberg Diaconal Hospital, Oslo, Norway; Department of Psychology, University of Oslo, Oslo, Norway; PsychGen Centre for Genetic Epidemiology and Mental Health, Norwegian Institute of Public Health, Oslo, Norway

**Corresponding author – email:** aiz@lds.no

**Supplementary Materials**

Table of Contents

[Table S1. List of abbreviations 2](#_Toc204617508)

[Table S2. Description of parental and child measures 3](#_Toc204617509)

[Table S3. Describing the proportions of sociodemographic, mental health and developmental factors per self-injurious behaviour group 7](#_Toc204617510)

[Table S4. Parental age at child’s birth per group 15](#_Toc204617511)

[Table S5. Missingness analysis 16](#_Toc204617512)

[Table S6. Prevalence of SIB per birth year 18](#_Toc204617513)

[Table S7. SIB item validation with ABC study 19](#_Toc204617514)

# Table S1. List of abbreviations

| **Abbreviation** | **Meaning** |
| --- | --- |
| SIB | self-injurious behaviours |
| MoBa | Norwegian Mother, Father and Child Cohort |
| MBRN | Medical Birth Registry of Norway |
| NPR | Norwegian Patient Registry |
| M | mother |
| F | father |
| C | child |
| Bl | baseline questionnaire (15-17 weeks of pregnancy) |
| 3y | 3-years-questionnaire |
| 8y | 8-years-questionnaire |
| N | Number of responses |
| CI | confidence interval |
| ADHD | Attention deficit hyperactivity disorder |
| BP | Bipolar disorder |
| PTSD | Post-traumatic stress disorder |
| ADI-R | Autism Diagnostic Interview Revised |

# Table S2. Description of parental and child measures

The following table S2 includes variable names, their source, description and coding or re-coding steps if applied. We included items from the MoBa questionnaires filled out by the mothers at 15-20 weeks of pregnancy (baseline questionnaires) as well as at the child’s age of 3 and 8 years. Additionally, we included data from the questionnaire filled out at baseline by the fathers.

For categorical variables, we transformed the responses into binary categories. Analyses of subgroups containing n smaller than 5 were not reported. When cleaning the data, we removed all impossible or implausible values.

|  | Source | Description | Re-coding of categories |
| --- | --- | --- | --- |
| Sociodemographic variables | | | |
| Child’s sex assigned at birth | **Medical Birth Registry of Norway (MBRN)** | 1 – female  0 – male | / |
| Parental age at child’s birth | **MBRN**  *MORS_ALDER*  *FARS_ALDER* | Maternal and paternal age in years at the time of giving birth | Mothers’ age set to be missing if registered as greater than 60 years. |
| Mothers’ living situation | **MoBa  Mother baseline questionnaire** | The living situation during pregnancy. Mothers were asked “With whom do you live together?”. The response categories were “spouse/partner”, “parents”, “parents-in-law”, “children”, “no-one”, “other”. | Re-coded:  1 - (living with) spouse/partner  0 - not living with a partner - including living alone or with others |
| Civil status | **MoBa 3 years questionnaire (maternal report)** | Mothers were asked: “What is your civil status?”. The response categories were “1-Married”, “2-Cohabitant”, “3-Single”, “4-Divorced/separated”, “5-Widow”, “6-Other”. | Re-coded:  1 - married or cohabitant  0 - single, divorced/separated, widow, other |
| Living with the child’s father | **MoBa 8 years questionnaire (maternal report)** | Living with child’s father. The mothers were asked: “Do you live with the child’s father?” The response categories were “1 - Yes”, “2 - No, we have separated”, “3 - No, I have never lived with the child’s father”. | Re-coded:  1 - yes  0 - “no, we have separated” or “No - I have never lived with child’s father” |
| Employment at pregnancy | **MoBa Mother baseline questionnaire** | Employment of the parents during pregnancy. Mothers were asked “What was your and your baby’s father’s work situation when you became pregnant?”. The response categories were “1 -student”, “2 -at home”, “3 -intern/apprentice”, “4-military service”, “5 -unemployed/laid off”, “6 -rehabilitation/disabled”, “7&8 -employed”, “9-self-employed”, “10&11 -other”. | Re-coded (for both mother and father)  1 - “employed” OR “ self-employed”  0 - any other selected response  without also choosing employed/self-employed |
| Highest education | **MoBa Mother baseline questionnaire** | Highest education of the parents during pregnancy. Mothers were asked “What education do you and the baby’s father have?”. The response categories were “1-9-year secondary school”, “2- 1-2 year high school”, “3-technical high-school”, “4- 3 year high school general studies, junior college”, “5-regional technical college, 4 year university degree”, “6-university, technical college, more than 4 years”, “7-other education”. | Re-coded (for mothers and fathers)  1 - “regional technical college, 4 year university degree” OR “university, technical college, more than 4 years”  0 - any other selected response |
| Norwegian as mother tongue of the parents | **MoBa Mother baseline questionnaire** | The mother tongue of the parents. Mothers were asked “Do you or the baby’s father have a mother tongue other than Norwegian?”. The response categories were “1-no”, “2-yes”. | Re-coded:  1 - no  0 – yes |
| Norwegian as mother tongue of the grandparents | **MoBa Mother baseline questionnaire** | The mother tongue of the baby’s grandparents. Mothers were asked “Do your parents or the baby’s father’s parents have a mother tongue other than Norwegian?”. The response categories were “1-no”, “2-yes”. | Re-coded:  1 - no  0 - yes |
| **Health-related behaviours in the parents** | | | |
| Smoking during pregnancy (mothers) | **MoBa Mother baseline questionnaire** | Mothers were asked whether they smoke now during pregnancy “Do you smoke now?”. The response categories were “1-No”, “2-sometimes”, “3-daily”. | Re-coded:  1 – yes (“sometimes“ OR “daily“)  0 – no |
| Smoking during pregnancy (fathers) | **MoBa Father baseline questionnaire** | Fathers were asked “Do you smoke now after your partner became pregnant?”. The response categories were “1-No”, “2-sometimes”, “3-daily”. | Re-coded:  1 – yes (“sometimes“ OR “daily“)  0 – no |
| Alcohol consumption during pregnancy (mothers) | **MoBa Mother baseline questionnaire** | The mothers were asked about alcohol consumption: “How often do you consume alcohol during pregnancy?”. The response categories were: “1-approximately 6-7 times a week”, “2-approximately 4-5 times a week”, “3-approximately 2-3 times a week”, “4-approximately once a week”, “5-approximately 1-3 times a month”, “6-less than once a month”, “7-never”. | Re-coded:  1 - any alcohol consumption (original responses 1 to 6)  0 - “never” |
| Alcohol consumption during pregnancy (fathers) | **MoBa Father baseline questionnaire** | Fathers were asked “How often do you drink now that your partner is pregnant?”. The response categories were: “1-approximately 6-7 times a week”, “2-approximately 4-5 times a week”, “3-approximately 2-3 times a week”, “4-approximately once a week”, “5-approximately 1-3 times a month”, “6-less than once a month”, “7-never”. | Re-coded:  1 - original responses 1 to 4 (once a week or more often)  0 - original responses 5 to 7 (less than once a week) |
| Eating behaviours during the last 18 months for at least 3 months (mothers) | **MoBa 3 years questionnaire (maternal report)** | The mothers were asked about eating disorders and behaviours: “Have you at some time during the last 18 months for a period lasting at least 3 months – experienced any of the following situations, and if so, how frequently was this?”. The items were:  “You lost control while eating, and could not stop before you had eaten far too much”  “Used vomiting to control your weight?”  “Used laxatives to control your weight?”  “Used fasting to control your weight?”  “Used hard physical exercise to control you weight?”  The response categories were “1-At least twice a week”, “2- 1-4 times a month”, “3- Seldom/never”. | Re-coded for each question:  1 - “at least twice a week” OR “1-4 times a month”  0 - “seldom/never” |
| Eating problems during the last 18 months (mothers) | **MoBa 3 years questionnaire (maternal report)** | The mothers were asked about eating behaviours: “Have you at some time during the last 18 months gone at least three months without a period in connection with a time when you have been having eating problems?”. The response categories were “1-no”, “2-yes”. | Re-coded:  1 – yes  0 - no |
| **Mental health and neurodevelopmental conditions  (mothers, fathers, & children)** | | |  |
| Depression | **Norwegian Patient Registry (NPR):** diagnoses registered between 2008 and 2021 | ICD-10 codes: F32 (incl. subcodes if applicable), F33 (incl. subcodes if applicable) | 1 = one or more codes recorded, 0 = no code recorded |
| Anxiety disorder | **NPR:** diagnoses registered between 2008 and 2021 | ICD-10 codes: F40 (incl. subcodes if applicable), F41 (incl. subcodes if applicable), F93 (incl. subcodes if applicable) | 1 = one or more codes recorded, 0 = no code recorded |
| Post-traumatic stress disorder (PTSD) | **NPR:** diagnoses registered between 2008 and 2021 | ICD-10 code: F43.1 | 1 = one or more codes recorded, 0 = no code recorded |
| Bipolar disorder (BP) | **NPR:** diagnoses registered between 2008 and 2021 | ICD-10 codes: F31 (incl. subcodes if applicable) | 1 = one or more codes recorded, 0 = no code recorded |
| Schizophrenia | **NPR:** diagnoses registered between 2008 and 2021 | ICD-10 codes: F20 (incl. subcodes if applicable) | 1 = one or more codes recorded, 0 = no code recorded |
| Attention deficit hyperactivity disorder (ADHD) | **NPR:** diagnoses registered between 2008 and 2021 | ICD-10 codes: F90 (incl. subcodes if applicable) | 1 = one or more codes recorded, 0 = no code recorded |
| Autism | **NPR:** diagnoses registered between 2008 and 2021 | ICD-10 codes: F84.0, F84.1, F84.5, F84.8, F84.9 | 1 = one or more codes recorded, 0 = no code recorded |
| Eating Disorders | **NPR:** diagnoses registered between 2008 and 2021 | ICD-10 codes: F50 (incl. subcodes if applicable) | 1 = one or more codes recorded, 0 = no code recorded |
| **Adverse life experiences of the mothers and children** | | | |
| Questions about bullying, being bullied and exposure to physical abuse (child) | **MoBa 8 years questionnaire (maternal report)** | The mothers were asked about the child being bullied, bullying others or being exposed to physical abuse (4 items) in the course of the past 12 months. The response categories were “1- never”, “2- seldom”, “3- 2-3 times per week”, “4- once a week”, “5- many times per week”. | Re-coded:  1 - original responses 2 to 5 (at least seldom)  0 - “never” |
| Experienced sexual violence/pressure during or before pregnancy (mothers) | **MoBa Mother baseline questionnaire** | Mothers were asked “Have you ever been pressured or forced to have sexual intercourse?”. The response categories were “No, never”, “Yes, pressured”, “Yes, forced with violence” and “Yes, raped”. | Re-coded:  1 - “Yes, forced with violence” OR “Yes, raped”  0 - “No, never” |
| **Mother reported (neuro-)developmental conditions in the 3- and 8-year-old children** | | | |
| Child’s  developmental conditions up until the age of 3 years (in the last 18 months) | **MoBa 3 years questionnaire (maternal report)** | The mothers were asked about child’s illnesses or health problems: “Has your child suffered any long-term illness or health problems since the age of 18 months?”.  The response categories were “1- no”, “2- yes, has now”, “3- yes, had previously”. | Re-coded:  1 – “yes, has now“ OR “yes, had previously“  0 - no |
| Child’s  developmental conditions up until the age of 8 years | **MoBa 8 years questionnaire (maternal report)** | The mothers were asked about child’s illnesses or health problems. M8 “Has your child ever had any of the following health problems?” (9 items/response categories)  M9: “Has your child ever had any of the following health problems?” (8 items). The response categories were “1- no”, “2- yes, currently”, “3- yes, in the past”. | Re-coded:  1 - “yes, currently”, OR “yes, in the past”  0 - no |

# Table S3. Describing the proportions of sociodemographic, mental health and developmental factors per self-injurious behaviour group

We included MoBa children with childbirth registered in the Medical Birth Registry of Norway (MBRN) whose mothers responded to the SIB item when the child was 3 and 8 years old. The following descriptive analysis was done for the four mutually exclusive groups: *No SIB (*answered with ‘no’ at 3 and 8 years*)*, *Transient SIB (*answered with ‘yes’ at 3 years only*)*, *Emergent SIB (*answered with ‘yes’ at 8 years only*)* and *Persistent SIB (*answered with ‘yes’ at 3 and 8 years)

Here we describe the proportions of the sociodemographic, mental health and neurodevelopmental binary factors across each of the four groups using percentages with confidence intervals. Confidence intervals of proportion were calculated using the absolute numbers of children in the analysed sample, the proportion of the analysed variable in each group and a 95% confidence level resulting in alpha 0.05. Furthermore, we are reporting p values from the independent sample chi square tests for each SIB group in comparison with the *No SIB* group. We do not report numbers on variables with fewer than five responses in a category, these are marked in the table as NA.

|  | **No SIB** | | **Transient SIB** | | | **Emergent SIB** | | | **Persistent SIB** | | |
| --- | --- | --- | --- | --- | --- | --- | --- | --- | --- | --- | --- |
| **Variable** | **N** | **% (95%CI)** | **N** | **% (95%CI)** | **P value** | **N** | **% (95%CI)** | **P value** | **N** | **% (95%CI)** | **P value** |
| ***Sociodemographic characteristics*** | | | |
| Living with partner (m, bl) | 32,230 | 97.46  (97.29-97.63) | 2,299 | 96.35  (96.15-96.54) | .001 | 431 | 95.59  (95.37-95.81) | .016 | 178 | 91.01  (90.70-91.32) | <.001 |
| Married/cohabitant (m, 3y) | 31,598 | 95.56  (95.33-95.78) | 2,281 | 93.42  (93.16-93.69) | <.001 | 419 | 91.65  (91.34-91.95) | <.001 | 178 | 87.64  (87.28-88.0) | <.001 |
| Living with child's father (m, 8yq) | 31,890 | 88.22  (87.87-88.57) | 2,292 | 84.69  (84.30-85.07) | <.001 | 424 | 80.66  (80.23-81.09) | <.001 | 180 | 73.89  (73.41-74.37) | <.001 |
| Child - female | 32,542 | 49.39  (48.85-49.94) | 2,336 | 47  (46.48-47.53) | .026 | 434 | 33.41  (32.9-33.92) | <.001 | 181 | 41.44  (40.90-41.97) | .033 |
| University degree (m) | 30,999 | 73.7  (73.22-74.17) | 2,189 | 65.74  (65.23-66.25) | <.001 | 409 | 67.73  (67.21-68.24) | .007 | 166 | 64.46  (63.93-64.99) | .008 |
| University degree (f) | 29,715 | 56.8  (56.26-57.34) | 2,129 | 50.82  (50.27-51.37) | <.001 | 393 | 52.42  (51.85-52.98) | .082 | 159 | 47.8  (47.23-48.37) | .023 |
| Employed (m) | 32,291 | 87.94  (87.59-88.30) | 2,307 | 84.83  (84.45-85.21) | <.001 | 430 | 83.95  (83.56-84.35) | .012 | 178 | 81.46  (81.04-81.88) | .009 |
| Employed (f) | 32,008 | 93.14  (92.86-93.41) | 2,283 | 91.37  (91.07-91.67) | .001 | 429 | 91.14  (90.83-91.45) | .106 | 175 | 87.43  (87.07-87.79) | ,004 |
| Norwegian as native language (parents) | 31,926 | 90.4  (90.08-90.72) | 2,278 | 87.71  (87.36-88.06) | <.001 | 425 | 84.71  (84.31-85.1) | <.001 | 177 | 83.05  (82.64-83.46) | .001 |
| Norwegian as native language (grandparents) | 31,862 | 85.39  (85.01-85.78) | 2,279 | 82.58  (82.18-82.98) | <.001 | 423 | 78.72  (78.28-79.17) | <.001 | 176 | 77.27  (76.81-77.73) | .003 |
| ***Health-related behaviours in the parents*** | | | |
| Smoking during pregnancy (m) | 29,242 | 5.47 (5.22-5.71) | 2,135 | 9.04 (8.72-9.36) | <.001 | 405 | 10.62  (10.27-10.97) | <.001 | 167 | 11.38  (11.01-11.74) | .001 |
| Smoking during pregnancy (f) | 14,931 | 36.48  (35.96-37.00) | 1,128 | 41.58  (40.82-42.34) | <.001 | 205 | 43.9  (43.11-44.69) | .029 | 84 | 35.71  (34.95-36.48) | .884 |
| Alcohol during pregnancy (m) | 28,599 | 13.01  (12.65-13.38) | 2,059 | 13.26  (12.88-13.64) | .747 | 395 | 11.14  (10.78-11.5) | .272 | 162 | 12.96  (12.57-13.35) | .986 |
| Alcohol min. once a week during pregnancy (f) | 25,984 | 38.17  (37.64-38.70) | 1,861 | 35.73  (35.17-36.3) | .037 | 330 | 43.03  (42.43-43.63) | .071 | 135 | 37.78  (37.19-38.37) | .926 |
| No eating problems for min. 3 mon in last 18mon | 30,928 | 1.09 (0.97- 1.20) | 2,229 | 1.62  (1.48- 1.75) | .023 | 412 | 2.91  (2.73- 3.10) | <.001 | 174 | NA | NA |
| Lost control when eating | 31,464 | 14.87  (14.48-15.25) | 2,270 | 19.34  (18.92-19.76) | <.001 | 424 | 24.29  (23.82-24.76) | <.001 | 176 | 26.14  (25.65-26.62) | <.001 |
| Vomiting to control weight | 31,469 | 1.36  (1.24- 1.49) | 2,269 | 1.81  (1.66- 1.95) | .083 | 424 | 3.07  (2.88- 3.26) | .004 | 175 | 4.57  (4.34- 4.8) | <.001 |
| Laxatives to control weight | 31,468 | 1.74  (1.60- 1.89) | 2,268 | 2.34  (2.18- 2.50) | .040 | 423 | 3.07  (2.88- 3.26) | .042 | 175 | 4.57  (4.34- 4.8) | .006 |
| Fasting to control weight | 31,470 | 2.08  (1.93- 2.24) | 2,268 | 3.92  (3.72- 4.13) | <.001 | 424 | 3.77  (3.56- 3.98) | .018 | 176 | 3.98  (3.76- 4.19) | .086 |
| Hard physical exercise to control weight | 31,433 | 12.19  (11.84-12.55) | 2,268 | 15.3  (14.92-15.68) | <.001 | 424 | 16.98  (16.57-17.39) | .003 | 175 | 13.71  (13.34-14.09) | .54 |
| ***Mental health and neurodevelopmental conditions in mothers*** | | | | | | | | | | | |
| ADHD (m) | 32,542 | 0.76  (0.67- 0.86) | 2,336 | 1.93  (1.78- 2.07) | <.001 | 434 | 2.53  (2.36- 2.7) | <.001 | 181 | 3.31  (3.12- 3.51) | <.001 |
| Anxiety (m) | 32,542 | 6.26  (6.0- 6.53) | 2,336 | 7.83  (7.55- 8.12) | .003 | 434 | 10.83  (10.9-11.16) | <.001 | 181 | 10.5  (10.17-10.83) | .021 |
| BP (m) | 32,542 | 0.65  (0.56- 0.73) | 2,336 | 1.33  (1.21- 1.45) | <.001 | 434 | 1.84  (1.70- 1.99) | .003 | 181 | NA | NA |
| Autism (m) | 32,542 | 0.03  (0.01- 0.05) | 2,336 | NA | NA | 434 | NA | NA | 181 | NA | NA |
| Depression (m) | 32,542 | 7.59  (7.3- 7.87) | 2,336 | 8.86  (8.56- 9.16) | .026 | 434 | 14.75  (14.36-15.13) | <.001 | 181 | 14.36  (13.98-14.74) | <.001 |
| Eating disorders (m) | 32,542 | 0.62  (0.54- 0.71) | 2,336 | 0.77  (0.68- 0.86) | .389 | 434 | 1.84  (1.7- 1.99) | .003 | 181 | NA | NA |
| PTSD (m) | 32,542 | 1.23  (1.11- 1.35) | 2,336 | 1.71  (1.58- 1.85) | .044 | 434 | 4.15  (3.93- 4.36) | <.001 | 181 | 4.97  (4.74- 5.21) | <.001 |
| Schizophrenia (m) | 32,542 | 0.02  (0.004- 0.03) | 2,336 | NA | NA | 434 | NA | NA | 181 | NA | NA |
| ***Mental health and neurodevelopmental conditions in fathers*** | | | | | | | | | | | |
| ADHD (f) | 27,856 | 0.95  (0.85- 1.06) | 2,004 | 1.0  (0.89- 1.11) | .836 | 359 | 5.01  (4.76- 5.27) | <.001 | 142 | 5.63  (5.36- 5.9) | <.001 |
| Anxiety (f) | 27,856 | 2.63  (2.46- 2.81) | 2,004 | 3.29  (3.09- 3.5) | .079 | 359 | 5.85  (5.58- 6.12) | <.001 | 142 | NA | NA |
| BP (f) | 27,856 | 0.63  (0.55- 0.72) | 2,004 | 0.75  (0.65- 0.85) | .527 | 359 | NA | NA | 142 | NA | NA |
| Autism (f) | 27,856 | 0.06  (0.04- 0.09) | 2,004 | NA | NA | 359 | NA | NA | 142 | NA | NA |
| Depression (f) | 27,856 | 4.46  (4.23- 4.68) | 2,004 | 4.74  (4.5- 4.98) | .551 | 359 | 6.96  (6.67- 7.26) | .024 | 142 | 8.45  (8.12- 8.78) | .024 |
| Eating disorders (f) | 27,856 | 0.03  (0.01- 0.05) | 2,004 | NA | NA | 359 | NA | NA | 142 | NA | NA |
| PTSD (f) | 27,856 | 0.43  (0.36- 0.50) | 2,004 | 0.7  (0.6- 0.79) | .081 | 359 | NA | NA | 142 | NA | NA |
| Schizophrenia (f) | 27,856 | 0.03  (0.008- 0.04) | 2,004 | NA | NA | 359 | NA | NA | 142 | NA | NA |
| ***Mental health and neurodevelopmental conditions in children*** | | | | | | | | | | | |
| ADHD (c) | 32,542 | 3.93  (3.72- 4.14) | 2,336 | 7.41  (7.13- 7.68) | <.001 | 434 | 21.2  (20.76-21.64) | <.001 | 181 | 19.34  (18.91-19.76) | <.001 |
| Anxiety (c) | 32,542 | 3.98  (3.77- 4.19) | 2,336 | 5.44  (5.2- 5.67) | <.001 | 434 | 8.53  (8.22- 8.83) | <.001 | 181 | 9.94  (9.62-10.27) | <.001 |
| BP (c) | 32,542 | 0.06  (0.03- 0.08) | 2,336 | NA | NA | 434 | NA | NA | 181 | NA | NA |
| Autism (c) | 32,542 | 1.28  (1.15- 1.40) | 2,336 | 2.44  (2.28- 2.6) | <.001 | 434 | 8.53  (8.22- 8.83) | <.001 | 181 | 9.39  (9.08- 9.71) | <.001 |
| Depression (c) | 32,542 | 1.83  (1.68- 1.97) | 2,336 | 1.80  (1.66- 1.94) | .915 | 434 | 3.92  (3.71- 4.13) | .002 | 181 | 3.87  (3.66- 4.08) | .047 |
| Eating disorders (c) | 32,542 | 0.97  (0.87- 1.08) | 2,336 | 0.9 (0.8- 1.0) | .72 | 434 | NA | NA | 181 | NA | NA |
| PTSD (c) | 32,542 | 0.35  (0.29- 0.42) | 2,336 | 0.9 (0.8- 1.0) | <.001 | 434 | NA | NA | 181 | NA | NA |
| Schizophrenia (c) | 32,542 | NA | 2,336 | NA | NA | 434 | NA | NA | 181 | NA | NA |
| ***Measures for adverse life experiences in mothers and children*** | | | | | | | | | | | |
| Bullied by other children (c) | 32,403 | 6.80  (6.53- 7.07) | 2,319 | 11.17  (10.84-11.50) | <.001 | 432 | 21.3  (20.85-21.74) | <.001 | 179 | 21.79  (21.34-22.24) | <.001 |
| Bullying other children (c) | 32,101 | 2.22  (2.06- 2.38) | 2,291 | 3.97  (3.77- 4.18) | <.001 | 427 | 11.01  (10.67-11.35) | <.001 | 176 | 7.39  (7.10- 7.67) | <.001 |
| Subject to violence by other children (c) | 32,410 | 2.09  (1.94- 2.25) | 2,321 | 3.66 (3.46- 3.86) | <.001 | 433 | 9.01  (8.7- 9.32) | <.001 | 180 | 7.22  (6.94- 7.50) | <.001 |
| Experience of sexual abuse ever (bl, m) | 32,227 | 16.37  (15.97-16.77) | 2,297 | 20.68  (20.25-21.11) | <.001 | 431 | 31.55  (31.05-32.06) | <.001 | 178 | 32.02  (31.51-32.53) | <.001 |
| ***Mother-reported developmental conditions in 3- and 8-year-old children*** | | | | | | | | | | | |
| Delayed motor development (3y) | 32,233 | 2.01  (1.86- 2.17) | 2,315 | 2.94  (2.76- 3.12) | .003 | 427 | 5.85  (5.6- 6.11) | <.001 | 177 | 11.86  (11.51-12.22) | <.001 |
| Hyperactivity (3y) | 32,229 | 0.30  (0.24- 0.36) | 2,311 | 1.43  (1.30- 1.55) | <.001 | 425 | 2.35  (2.19- 2.52) | <.001 | 178 | 4.49  (4.27- 4.72) | <.001 |
| Late or abnormal speech development (3y) | 32,208 | 3.33  (3.13- 3.52) | 2,309 | 5.15  (4.92- 5.39) | <.001 | 428 | 10.51  (10.18-10.85) | <.001 | 176 | 12.5  (12.14-12.86) | <.001 |
| Sleep problems (3y) | 32,210 | 4.05  (3.83- 4.26) | 2,317 | 7.47  (7.19- 7.74) | <.001 | 426 | 8.69  (8.38- 8.99) | <.001 | 178 | 14.04  (13.67-14.42) | <.001 |
| Trouble relating to others (3y) | 32,234 | 0.17  (0.13- 0.22) | 2,310 | 0.74  (0.65- 0.83) | <.001 | 427 | NA | NA | 178 | 4.49  (4.27- 4.72) | <.001 |
| Autistic traits/autism (8y) | 31,414 | 0.73  (0.64- 0.82) | 2,233 | 2.42  (2.25- 2.58) | <.001 | 406 | 8.62  (8.31- 8.93) | <.001 | 174 | 9.77  (9.44-10.1) | <.001 |
| Behavioral problems (8y) | 31,400 | 4.57  (4.34- 4.79) | 2,233 | 10.17  (9.84-10.49) | <.001 | 416 | 30.05  (29.54-30.55) | <.001 | 171 | 34.50  (33.98-35.03) | <.001 |
| Concentration or attention difficulties (8y) | 31,401 | 7.29  (7.01- 7.57) | 2,239 | 14.56  (14.18-14.94) | <.001 | 411 | 33.09 (32.57-33.61) | <.001 | 177 | 35.03  (34.50-35.55) | <.001 |
| Delayed psychomotor development (8y) | 31,354 | 1.48  (1.35- 1.61) | 2,216 | 3.16  (2.97- 3.35) | <.001 | 410 | 8.78 (8.47- 9.09) | <.001 | 171 | 18.13  (17.70-18.55) | <.001 |
| Delayed/abnormal language development (8y) | 31,491 | 7.21  (6.93- 7.49) | 2,241 | 10.13  (9.81-10.45) | <.001 | 413 | 17.19  (16.78-17.61) | <.001 | 173 | 17.34  (16.92-17.76) | <.001 |
| Emotional difficulties (8y) | 31,376 | 6.89  (6.62- 7.17) | 2,240 | 11.65  (11.31-11.99) | <.001 | 414 | 31.88  (31.37-32.4) | <.001 | 174 | 32.76  (32.24-33.28) | <.001 |
| Hyperactivity (8y) | 31,375 | 1.72  (1.58- 1.86) | 2,236 | 4.38  (4.16- 4.60) | <.001 | 406 | 12.32  (11.95-12.68) | <.001 | 178 | 17.98  (17.55-18.40) | <.001 |

# Table S4. Parental age at child’s birth per group

We described parental age at child’s birth across each of the four groups using the total of responses for the variables for each of the groups, means with standard deviations and p values from independent sample t-tests for each of the SIB groups in comparison with the *No SIB* group.

|  | **No SIB** | | **Transient SIB** | | | **Emergent SIB** | | | **Persistent SIB** | | |
| --- | --- | --- | --- | --- | --- | --- | --- | --- | --- | --- | --- |
|  | **N** | **Mean (SD)** | **N** | **Mean (SD)** | **P value** | **N** | **Mean (SD)** | **P value** | **N** | **Mean (SD)** | **P value** |
| Age at child's birth (f) | 32,542 | 33.19  (4.31) | 2,336 | 32.41  (4.63) | <.001 | 434 | 32.6  (4.59) | .021 | 181 | 32.06  (4.47) | .004 |
| Age at child's birth (m) | 32,542 | 30.8  (5.2) | 2,336 | 29.69  (5.44) | <.001 | 434 | 29.93  (5.75) | <.001 | 181 | 29.4  (5.46) | <.001 |

# Table S5. Missingness analysis

To explore the potential impact of missing data, we conducted a sensitivity analysis comparing responders with non-responders at the child ages of 3 and 8 years for the following key demographic variables: mother living with a partner (at baseline), maternal employment status (at baseline), maternal highest educational attainment (at baseline), and only for 8 years, SIB reported at 3 years. Furthermore, we compared the diagnoses of mental health and neurodevelopmental conditions of the mothers and the children from the Norwegian Patient Registry. We report the N and percentage (%) of individuals endorsing each of the demographic/mental health variables per group of responders and non-responders, e. g. 55,478 (95.75%) of the responders (mothers) to the SIB item at child’s age of 3 years were living with a partner at baseline (during pregnancy), vs. 43,518 (77.67%) of the non-responders were living with a partner at baseline. The P value indicates whether the comparison between the proportions of those endorsing the item differed significantly between responders and non-responders.

|  | **SIB 3y** | | | **SIB 8y** | | |
| --- | --- | --- | --- | --- | --- | --- |
|  | **N responders (%)** | **N non-responders (%)** | **P value** | **N responders (%)** | **N non-responders (%)** | **P value** |
| Living with partner (bl, m) | 55,478 (95.75) | 43,518 (77.67) | <.001 | 41,105 (95.66) | 57,891 (81.54) | <.001 |
| Employed (m) | 49,460 (85.37) | 36,929 (65.91) | <.001 | 36,932 (85.95) | 49,457 (69.66) | <.001 |
| University degree (m) | 37,971 (65.54) | 25,104 (44.81) | <.001 | 29,275 (68.13) | 33,800 (47.61) | <.001 |
| Depression (m) | 4,828 (8.33) | 6,248 (11.15) | <.001 | 3,493 (8.13) | 7,583 (10.68) | <.001 |
| Depression (c) | 1,203 (2.08) | 1,396 (2.49) | <.001 | 797 (1.85) | 1,802 (2.54) | <.001 |
| Anxiety (m) | 3,943 (6.81) | 5,005 (8.93) | <.001 | 2,842 (6.61) | 6,106 (8.60) | <.001 |
| Anxiety (c) | 2,611 (4.51) | 2,770 (4.94) | .030 | 1,792 (4.17) | 3,589 (5.06) | <.001 |
| PTSD (m) | 917 (1.58) | 1,564 (2.79) | <.001 | 616 (1.43) | 1,865 (2.63) | <.001 |
| PTSD (c) | 290 (0.5) | 458 (0.82) | <.001 | 177 (0.41) | 571 (0.80) | <.001 |
| BP (m) | 510 (0.88) | 824 (1.47) | <.001 | 323 (0.75) | 1,011 (1.42) | <.001 |
| BP (c) | 44 (0.08) | 65 (0.12) | .044 | 31 (0.07) | 78 (0.11) | <.001 |
| Schizophrenia (m) | 16 (0.03) | 48 (0.09) | <.001 | 8 (0.02) | 56 (0.08) | <.001 |
| Schizophrenia (c) | 13 (0.02) | 20 (0.04) | .223 | 6 (0.01) | 27 (0.04) | <.001 |
| ADHD (m) | 615 (1.06) | 1,189 (2.12) | <.001 | 407 (0.95) | 1,397 (1.97) | <.001 |
| ADHD (c) | 2,782 (4.80) | 3,213 (5.73) | <.001 | 1,915 (4.46) | 4,080 (5.75) | <.001 |
| Autism (m) | 39 (0.07) | 38 (0.07) | .909 | 19 (0.04) | 58 (0.08) | <.001 |
| Autism (c) | 984 (1.70) | 921 (1.64) | .149 | 632 (1.47) | 1,273 (1.79) | <.001 |
| Eating disorders (m) | 447 (0.77) | 569 (1.02) | <.001 | 297 (0.69) | 719 (1.01) | <.001 |
| Eating disorders (c) | 571 (0.99) | 527 (0.94) | .184 | 425 (0.99) | 673 (0.95) | <.001 |
| SIB at 3 years (c)- yes |  |  |  | 2,517 (5.86) | 1,746 (2.46) | <.001 |

###

# Table S6. Prevalence of SIB per birth year

| **Birth year** | **n No SIB (%)** | **n Transient SIB (%)** | **n Emergent SIB (%)** | **n Persistent SIB (%)** |
| --- | --- | --- | --- | --- |
| 2002 | 1,629 (92.71) | 97 (5.52) | 26 (1.48) | 5 (0.28) |
| 2003 | 4,683 (92.35) | 318 (6.27) | 46 (0.91) | 24 (0.47) |
| 2004 | 4,547 (92.10) | 307 (6.22) | 53 (1.07) | 30 (0.61) |
| 2005 | 5,307 (91.88) | 382 (6.61) | 67 (1.16) | 20 (0.35) |
| 2006 | 5,748 (91.62) | 410 (6.53) | 82 (1.31) | 34 (0.54) |
| 2007 | 5,254 (90.99) | 407 (7.05) | 83 (1.44) | 30 (0.52) |
| 2008 | 4,221 (90.83) | 335 (7.21) | 62 (1.33) | 29 (0.62) |
| 2009 | 1,154 (91.73) | 80 (6.36) | 15 (1.19) | 9 (0.72) |
| **Total N per group** | **32,543** | **2,336** | **434** | **181** |

We examined the prevalence of SIB in absolute numbers and percentages per birth year and group (No SIB, Transient SIB, Emergent SIB, Persistent SIB) to explore potential time effects. No SIB data was collected for children born in the first three years of the data collection (1999-2001).

# Table S7. SIB item validation with ABC study

We used the MedCalc tool (<https://www.medcalc.org/calc/diagnostic_test.php>) to calculate the sensitivity, specificity and the positive and negative likelihood ratios to validate the MoBa 3-year-questionnaire SIB item using the ADI-R interview item on SIB from the ABC study. We cross-tabulated the responses to analyse the overlap of the responses of the mothers on their children across the two measurements on SIB. The ADI-R interview measure timepoint was limited maximum one year after the MoBa 3-year-questionnaire was filled out.

| **Test** | **SIB present** | **n** | **SIB absent** | **n** | **Total** |
| --- | --- | --- | --- | --- | --- |
| **Positive** | True Positive | a=80 | False Positive | c=36 | a + c = **116** |
| **Negative** | False Negative | b=62 | True Negative | d=516 | b + d = **578** |
| **Total** |  | a + b =  **142** |  | c + d =  **552** |  |

| **Statistic** | **Value** | **95% CI** |
| --- | --- | --- |
| Sensitivity | 56.34% | 47.77% to 64.64% |
| Specificity | 93.48% | 91.09% to 95.39% |
| Positive Likelihood Ratio | 8.64 | 6.10 to 12.23 |
| Negative Likelihood Ratio | 0.47 | 0.39 to 0.56 |
